# Supplementary material for: Physiological and Biochemical Responses of Lavandula angustifolia to Salinity Under Mineral Foliar Application
Source: PubMed Central journal article supplement (PMC5920160; doi:10.3389/fpls.2018.00489), 2018-04-20
Supplement: Presentation1.pdf [file Presentation1.pdf]

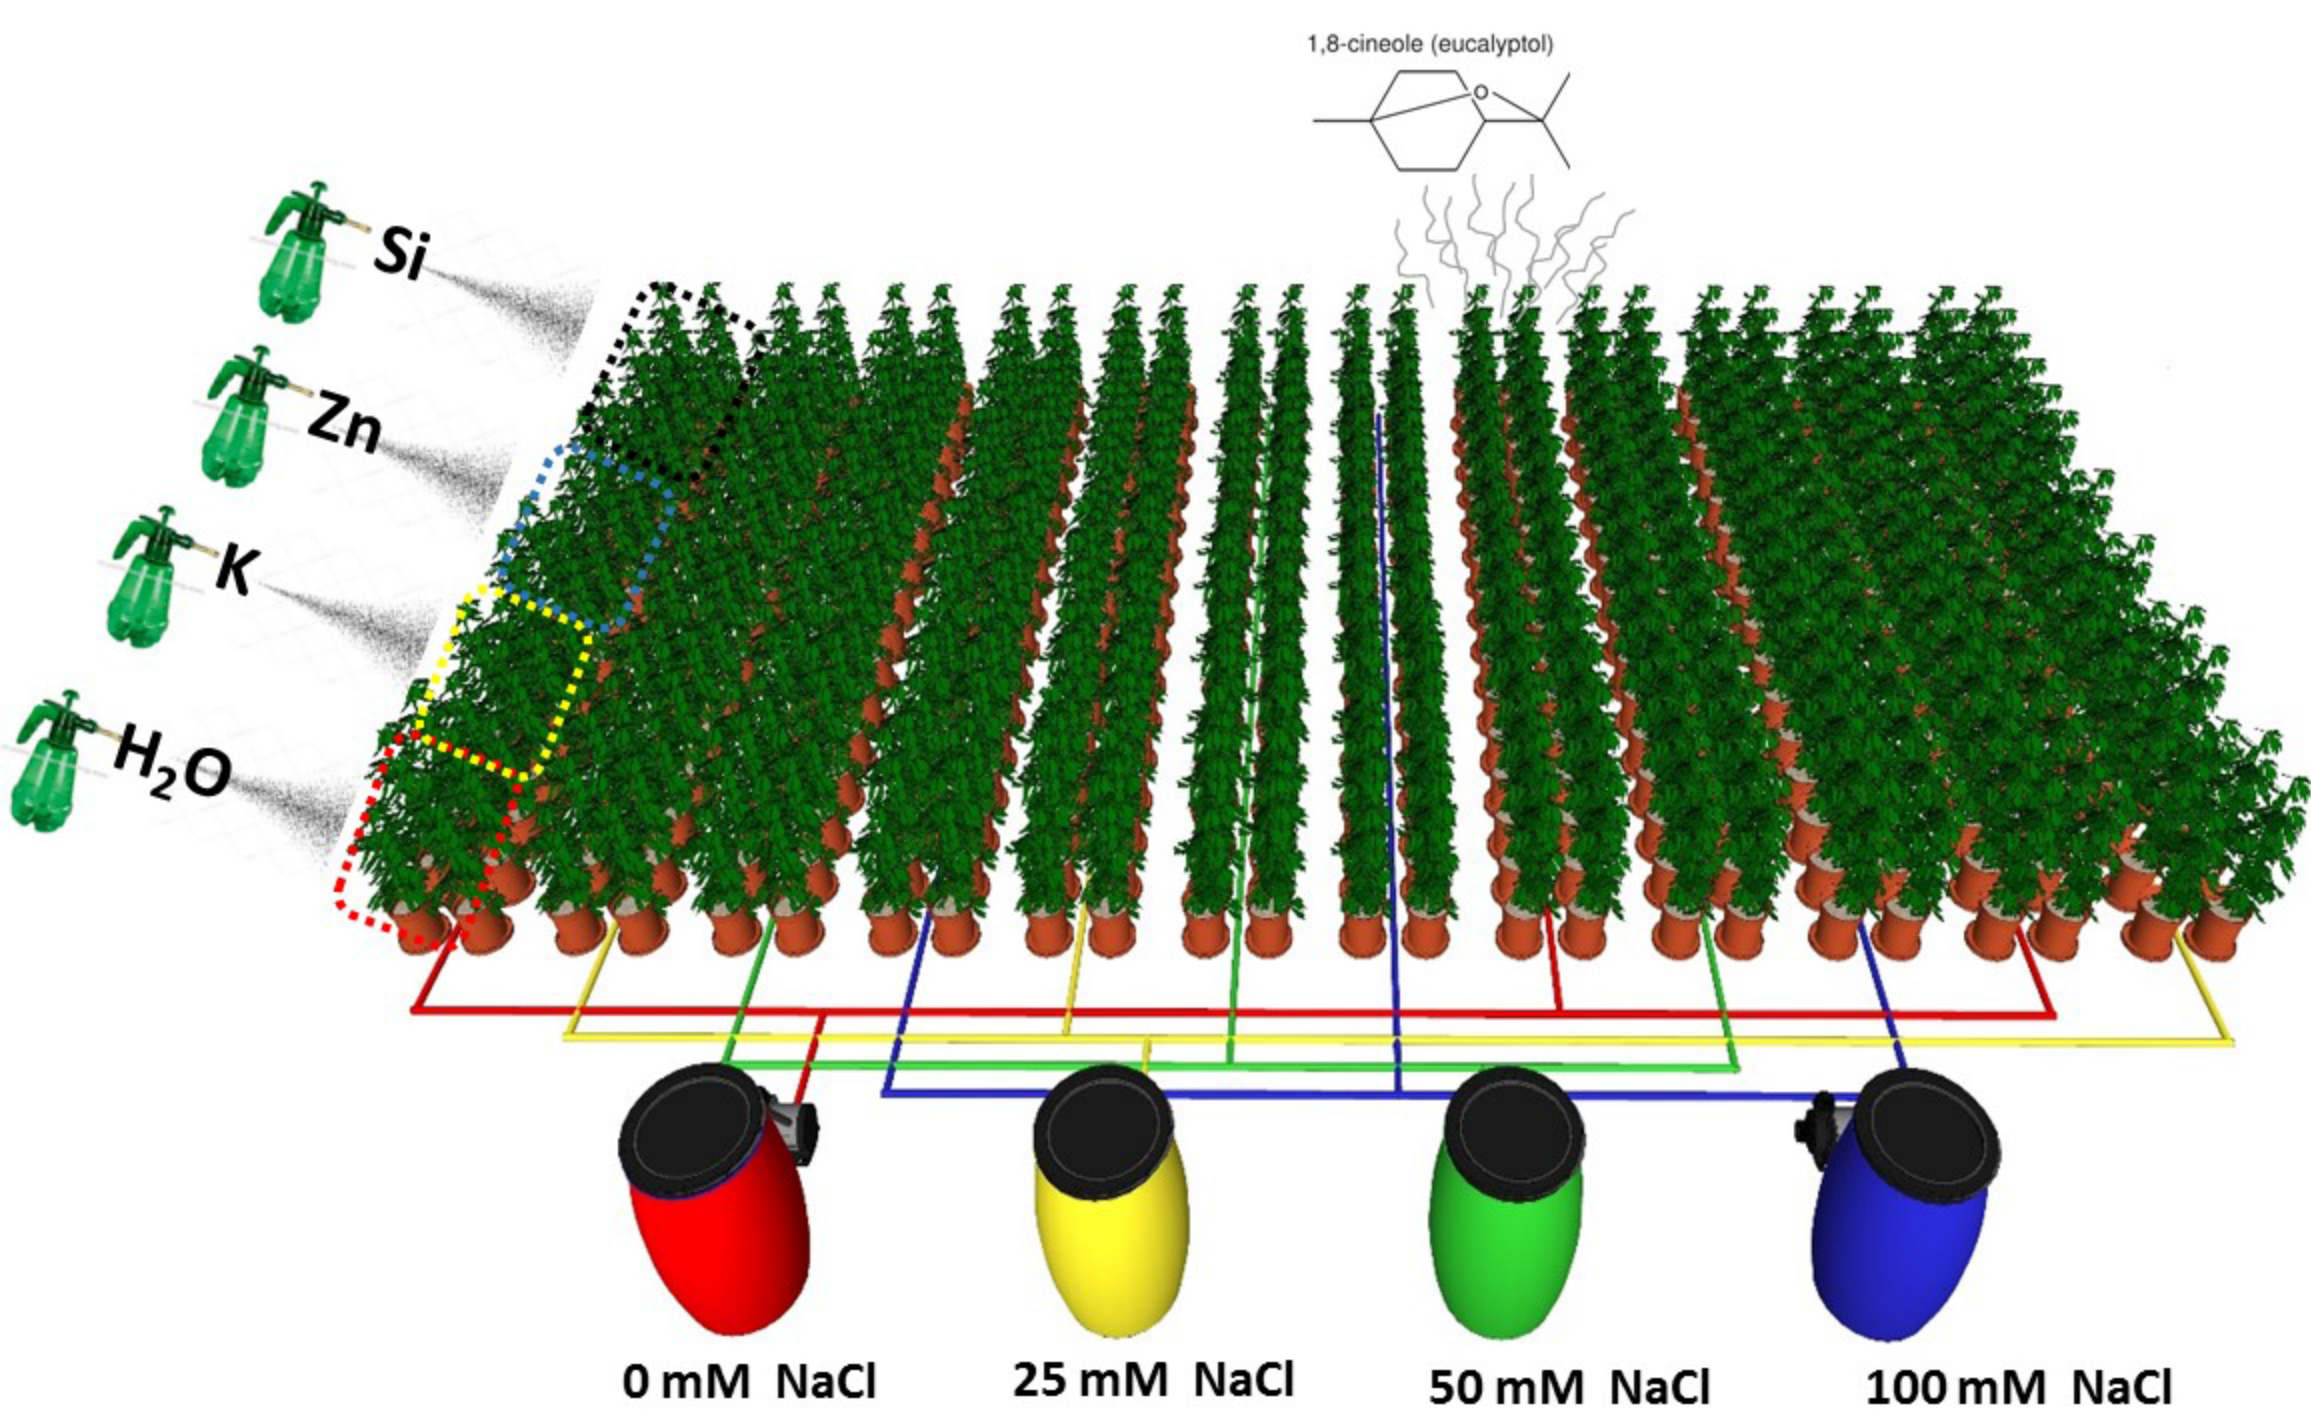

Supplementary Presentation 1. Experimental set up. Effects of salinity and/or cation foliar application in lavender grown hydroponically.
